# Supplementary material
Source: PubMed Central journal article supplement (PMC4044720)

# Supplemental figure S1

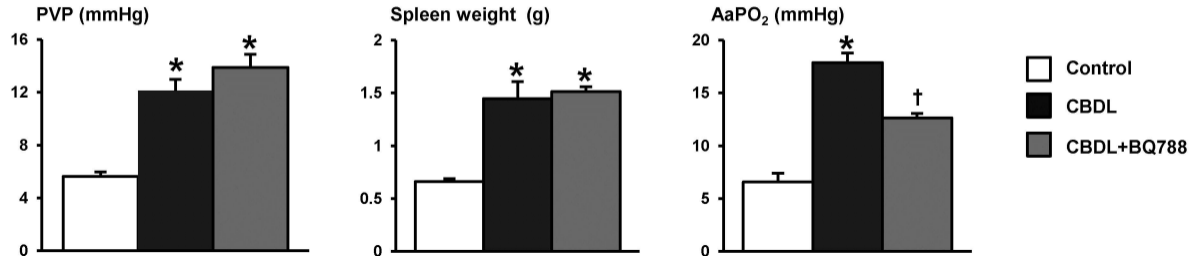

Supplement: mmc1.pdf [file mmc1.pdf]

# Supplemental figure S2

**ED1**

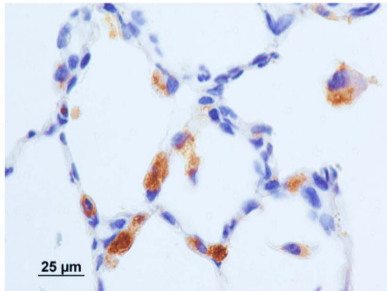

**ED2**

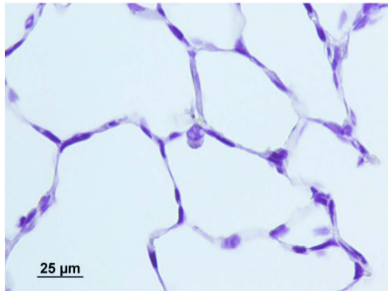

Supplement: mmc2.pdf [file mmc2.pdf]

Supplemental figure S3

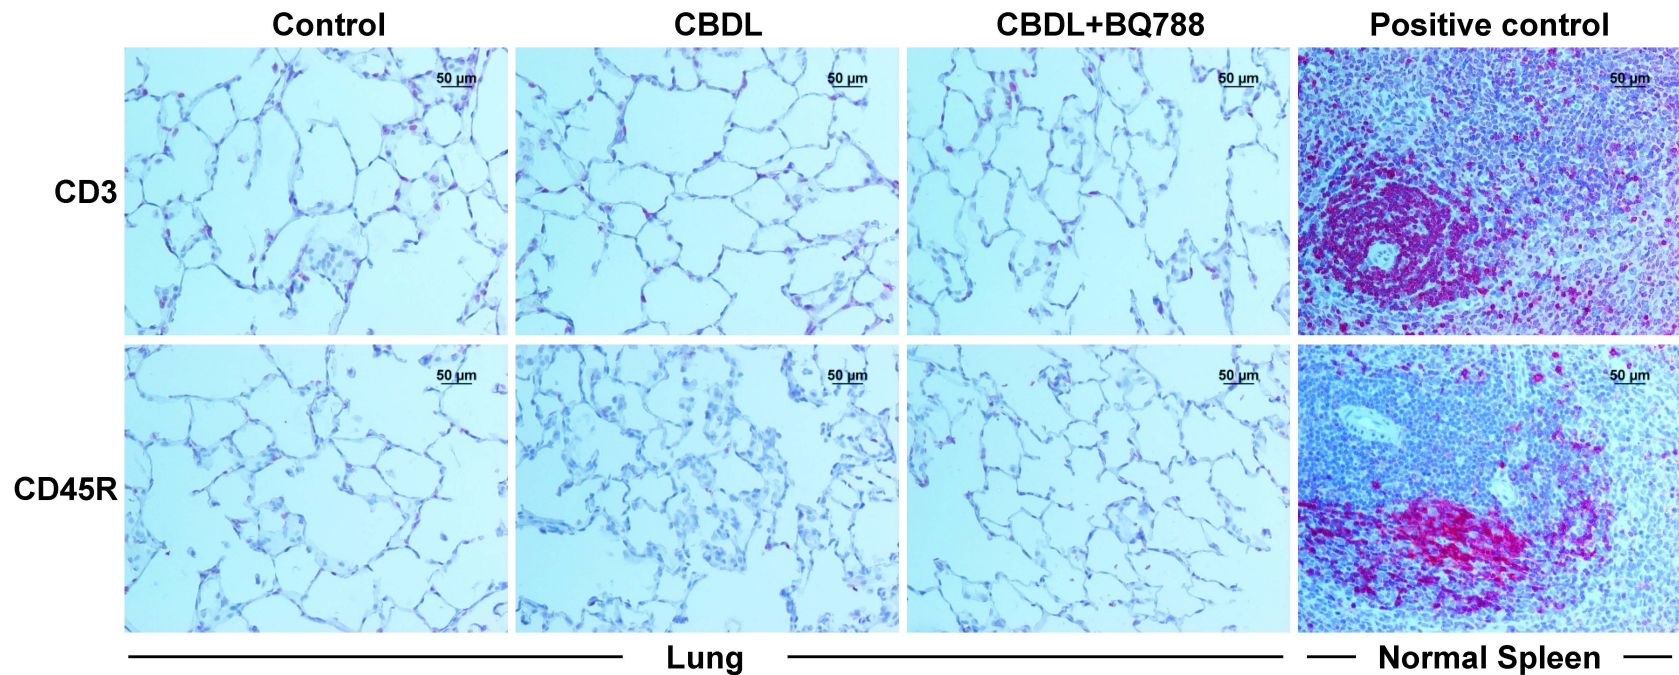

Supplement: mmc3.pdf [file mmc3.pdf]

# Supplemental figure S4

**CBDL**

**CBDL+BQ788**

**ED1**

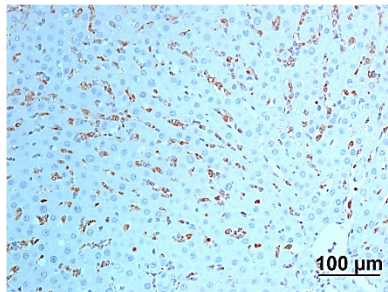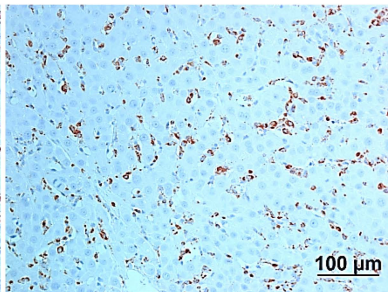

**ED2**

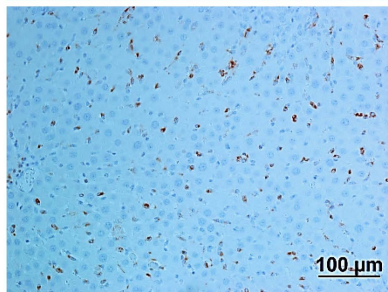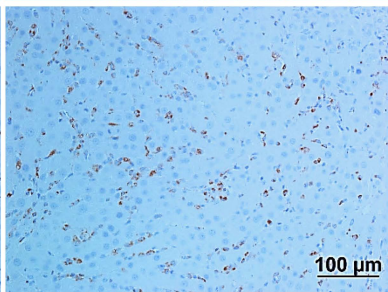

Supplement: mmc4.pdf [file mmc4.pdf]

# Supplemental figure S5

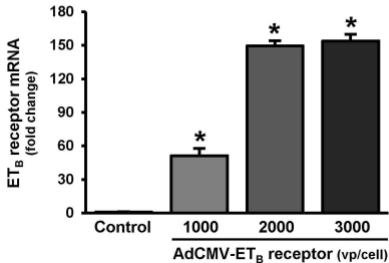

Supplement: mmc5.pdf [file mmc5.pdf]

# Supplemental figure S6

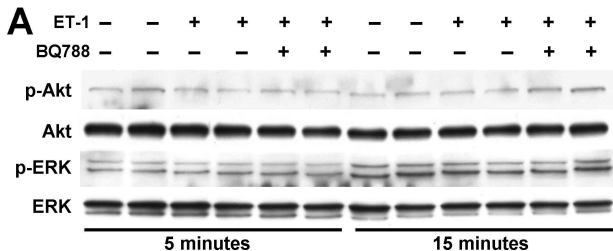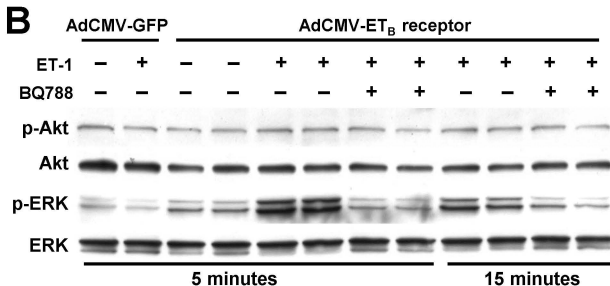

Supplement: mmc6.pdf [file mmc6.pdf]

# Supplemental figure S7

VEGF-A (mRNA, fold control)

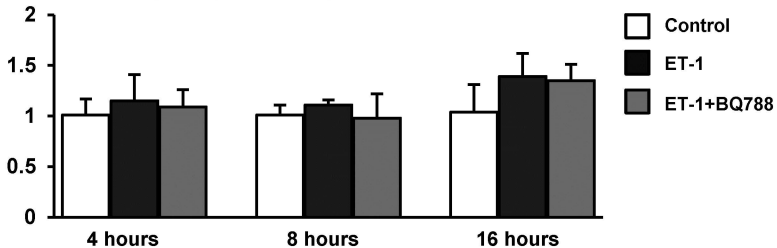

Supplement: mmc7.pdf [file mmc7.pdf]
